# Supplementary material
Source: publisher figshare collection journal article supplement (https://tandf.figshare.com/ndownloader/files/24713590)
Supplement: Supplementary file 1 [file 24713590]

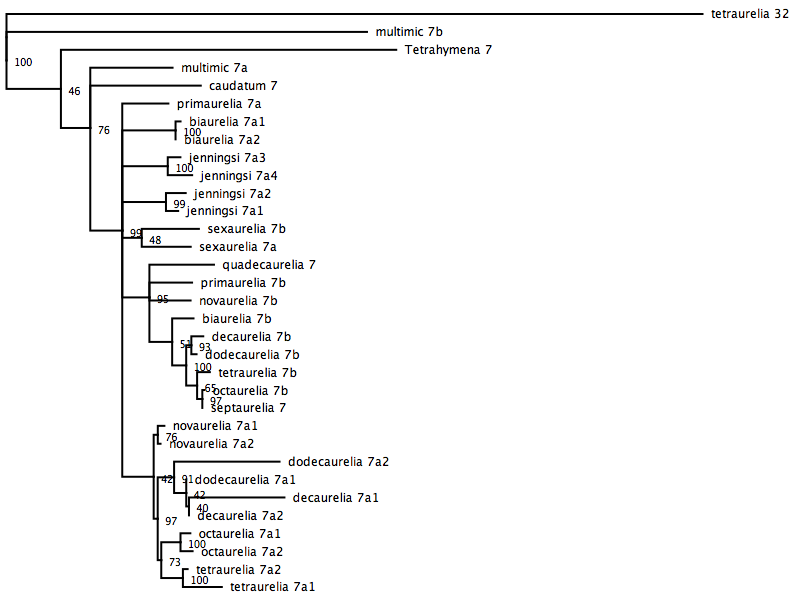


**Figure S1.** Neighbor joining phylogeny showing evolutionary relationships between *P. aurelia* Rab7 coding sequences. *P. tetraurelia* Rab32 gene was designated as an outgroup.
